# Supplementary material for: Reinfection of Transplanted Livers in HCV- and HCV/HIV-Infected Patients Is Characterized by a Different MicroRNA Expression Profile
Source: MDPI journal article supplement (doi:10.3390/cells11040690), 2022-02-16
Supplement: s1 [file s1]

Supplementary Table S1. Clinicopathological features of the 6 cases included in the study. LB: liver biopsy.

|                                          | HCV                   |                       |                       | HCV/HIV               |                        |                        |
|------------------------------------------|-----------------------|-----------------------|-----------------------|-----------------------|------------------------|------------------------|
|                                          | Patient 1             | Patient 2             | Patient 3             | Patient 1             | Patient 2              | Patient 3              |
| Age at transplant (years)                | 69                    | 50                    | 58                    | 44                    | 51                     | 50                     |
| Sex                                      | male                  | male                  | male                  | male                  | male                   | male                   |
| Blood type                               | A+                    | AB+                   | A+                    | 0-                    | 0+                     | 0+                     |
| HCV genotype                             | 1B                    | 1A                    | 1A                    | 1A                    | 1B                     | 1A                     |
| Donor age (years)                        | 43                    | 76                    | 74                    | 58                    | 46                     | 53                     |
| Donor sex                                | female                | male                  | male                  | female                | female                 | male                   |
| ABO histocompatibility                   | isocompatible         | isocompatible         | isocompatible         | isocompatible         | isocompatible          | isocompatible          |
| HCV peripheral viral load, at LB (UI/mL) | 1062 x10 <sup>3</sup> | 7393 x10 <sup>3</sup> | 3917 x10 <sup>3</sup> | 6421 x10 <sup>3</sup> | 18880 x10 <sup>3</sup> | 10460 x10 <sup>3</sup> |
| HIV peripheral viral load, at LB (UI/mL) | //                    | //                    | //                    | undetectable          | undetectable           | undetectable           |
| CD4+ count, at LB (cells/uL)             | //                    | //                    | //                    | 209                   | 621                    | 201                    |
| Grading, according Ishak classificantion | 4                     | 3                     | 4                     | 4                     | 4                      | 3                      |
| Staging, according Ishak classificantion | 0                     | 1                     | 1                     | 1                     | 0                      | 1                      |
| Time from LB and miRNA analysis (months) | 125                   | 121                   | 118                   | 125                   | 118                    | 128                    |
